# Supplementary material for: Early Parenting Interactions and First-Time Mothers’ Postnatal Depression and Parental Competence
Source: MDPI journal article supplement (doi:10.3390/ejihpe14040063), 2024-04-06
Supplement: s1 [file s1]

**Supplemental Table S1.** Sociodemographic characteristics of participants

|                                      | Frequency (N) | Percent (%) |
|--------------------------------------|---------------|-------------|
| Age                                  |               |             |
| 18 – 24                              | 3             | 1.4         |
| 25 – 29                              | 41            | 18.6        |
| 30 – 34                              | 129           | 58.6        |
| 35 – 39                              | 39            | 17.7        |
| 40 – 44                              | 8             | 3.6         |
| Ethnicity/Dialect Group              |               |             |
| Hokkien                              | 69            | 31.2        |
| Teochew                              | 35            | 15.8        |
| Cantonese                            | 34            | 15.4        |
| Hakka (Khek)                         | 16            | 7.2         |
| Hainanese                            | 8             | 3.6         |
| Malay                                | 27            | 12.2        |
| Javanese                             | 4             | 1.8         |
| Tamil                                | 3             | 1.4         |
| White                                | 5             | 2.3         |
| Eurasian                             | 3             | 1.4         |
| Others                               | 16            | 7.3         |
| Nationality                          |               |             |
| Singaporean                          | 182           | 82.4        |
| Malaysian                            | 19            | 8.6         |
| Indian                               | 3             | 1.4         |
| Chinese                              | 3             | 1.4         |
| Others                               | 13            | 5.9         |
| Highest Education Level              |               |             |
| Post-secondary of Lower              | 12            | 5.5         |
| Polytechnic Diploma                  | 17            | 7.7         |
| Professional Qualification/Diploma   | 15            | 6.8         |
| University (First Degree)            | 135           | 61.1        |
| University Postgraduate              | 41            | 18.6        |
| Employment Status                    |               |             |
| Stay-at-home Mother                  | 32            | 14.5        |
| Employed                             | 187           | 84.5        |
| Monthly Household Income             |               |             |
| < S\$1000                            | 5             | 2.3         |
| S\$1000 – S\$4999                    | 51            | 23.1        |
| S\$5000 – S\$8999                    | 60            | 27.1        |
| S\$9000 – S\$12999                   | 47            | 21.3        |
| S\$13000 – S\$19999                  | 34            | 15.4        |
| > S\$20000                           | 23            | 10.4        |
| Primary Caregiver (during childhood) |               |             |
| Mostly mother                        | 120           | 54.5        |
| Mostly father                        | 5             | 2.3         |
| Shared equally by mother & father    | 43            | 19.5        |
| Foreign domestic worker              | 15            | 6.8         |
| Others (e.g., relatives)             | 37            | 16.8        |
| Birth Complications (own infant)     |               |             |
| Yes                                  | 53            | 24.0        |
| No                                   | 166           | 75.5        |
| Baby's Health (own infant)           |               |             |
| Excellent                            | 109           | 49.5        |
| Very Good                            | 82            | 37.2        |
| Good                                 | 23            | 10.5        |
| Average                              | 6             | 2.7         |
